# Supplementary material for: Microparticle-associated tissue factor activity correlates with the inflammatory response in septic disseminated intravascular coagulation patients
Source: PeerJ. 2024 Jan 8;12:e16636. doi: 10.7717/peerj.16636 (PMC10782946; doi:10.7717/peerj.16636)
Supplement: Supplemental Information 1 [file peerj-12-16636-s001.xlsx]

## Sheet: Sheet1
DIC group patients with sepsis
	gender	age	DIC score	WBC	Neutral fraction	CRP	PCT	MP-FXa	Interleukin-1	TNF-a
1	Male	43	5	13.27	86.44	141	30.69	0.082977	4.28965	4.57384
2	Male	48	5	14.6	86.14	149	1.42	0.104279	1.08774	1.64383
3	Male	24	5	12.84	89.24	237	100	0.174023	30.7241	109.021
4	Male	77	5	18.21	88.54	196	5.69	0.127765	1.37723	3.36573
5	Male	35	5	11.44	88.11	291	4.44	0.094529	1.31081	2.67641
6	Male	49	6	29.98	91.14	252	44.87	0.388014	4.39714	5.43817
7	Male	35	5	13.6	87.34	547	100	0.566752	6.66414	15.0227
8	Male	55	5	14.35	93.14	154	100	0.364448	5.83882	14.1456
9	Male	72	5	12.4	84.34	169	40.73	0.186921	4.37026	4.91943
10	Male	46	6	10.53	74.74	172	18.8	0.141667	3.35101	4.40111
11	Male	61	6	25.91	93.34		9.47	0.104932	2.08238	3.88321
12	Male	76	5	14.83	85.14	189	16.79	0.054535	3.0968	4.0558
13	Male	65	5	10.45	91.64	73	5.01	0.011967	1.35066	3.19333
14	Male	82	5	21.28	94.44	219	65.49	0.034314	4.92172	5.95733
15	female	70	5	30.85	91.54	624	100	0.437248	5.73077	13.4447
16	Male	54	5	12.55	85.74	199	91.79	0.316915	5.00252	7.69089
17	Male	58	5	15.01	92.01	273	100	0.425163	5.51479	11.172
18	female	48	6	7.01	72.94	398	100	0.809487	5.46082	9.08109
19	Male	55	5	17.94	93.84	222	7.12	0.83216	1.88262	3.71067
20	Male	83	6	9.41	91.54	193	6.64	7.09686	1.6165	3.53818
21	female	65	5	12.72	83.24	56.8	13.34	0.115069	2.76268	3.88321
22	Male	84	5	12.06	80.54	95.4	2.29	0.165101	1.23112	2.5042
23	Male	73	6	27.33	94.64	212	80.32	0.356349	4.98905	6.82353
24	Male	55	7	4.96	74.81	17.2	2.22	0.098561	1.20456	2.15991
25	female	80	7	11.39	91.84	186	5.22	0.109095	1.37723	3.36573
26	Male	83	6	20.37	93.14	153	100	0.098793	5.33943	8.90715
27	Male	52	5	6.04	82.11	75.8	4.42	0.323069	1.29752	2.5042
28	Male	63	5	3.3	85.84	223	23.88	0.286879	3.59206	4.40111
29	Male	55	5	49.46	92	135	60.87	0.387939	4.90826	5.95733
30	Male	73	5	10.6	92.74	283	52.72	0.204266	4.65258	5.43817
31	Male	49	5	12.29	85.84	142	33.78	0.116147	4.31652	4.74661
Patients with sepsis and non-DIC group
	gender	age	DIC score	WBC	Neutral fraction	CRP	PCT	MP-FXa	Interleukin-1	TNF-a
1	female	63	2	10.36	65.34	126	2.01	0.029051	0.872814	1.47189
2	Male	25	2	4.11	78.61	99.1	0.67	0.007098	0.78	0.956371
3	Male	35	3	21.53	82.44	196	29.14	0.34231	3.40456	3.36573
4	Male	80	4	29.5	80.14	13.7	9.89	0.044886	1.70961	2.5042
5	Male	78	3	14.17	89.34	132	0.59	0.060957	0.687219	0.956371
6	Male	75	4	21.4	94.04	162	15.4	0.128231	1.94919	2.84867
7	Male	81	3	9.88	96.44	169	7.83	0.211138	1.45697	2.15991
8	Male	61	2	12.32	88.44	142	9.25	0.102726	1.57661	2.5042
9	Male	87	2	7.67	70.24	116	3.42	0.07597	0.952395	1.64383
10	Male	66	3	10.68	95.04	63.4	53.59	0.414448	6.06858	5.61118
11	Male	58	4	12.26	92.14	450	46.98	0.28089	5.16418	4.74661
12	female	76	4	14.46	92.94	160	5.65	0.063608	1.36395	1.81581
13	Male	49	3	9.72	85.44	185	6.51	0.236986	1.44368	1.98784
14	Male	82	3	4.83	82.64	76.4	2.14	0.15675	0.912601	1.64383
15	Male	59	4	6.84	86.94	389	8.25	0.115201	1.51013	2.33203
16	Male	86	2	11.35	87.64	97.9	13.96	0.161126	1.89593	2.67641
17	female	71	3	9.35	85.44	101	1.65	0.0921815	0.846292	1.47189
18	Male	60	3	15.76	88.84	179	3.59	0.161441	1.15145	1.81581
19	female	82	2	19.67	89.14	239	3.5	0.044837	0.965661	1.81581
20	Male	62	0	9.22	83.54	71.6	0.22	0.026021	0.0518869	0.0980992
21	female	53	4	8.8	83.61	157	1.22	0.027825	0.793257	1.30001
22	female	67	3	7.45	75.04	90	5.04	0.255624	1.29752	1.81581
23	female	75	4	7.47	84.1	146	5.71	0.065473	1.37723	1.98784
24	female	57	3	14.4	85.41	79.8	0.44	0.050028	0.687219	0.784624
25	female	55	3	15	83.84	116	3.42	0.156928	0.93913	1.64383
26	Male	72	3	8.12	80.41	68.5	0.41	0.014432	0.687219	0.612923
27	Male	66	3	7.31	80.01	104	0.39	0.00309	0.435549	0.441268
28	Male	83	2	9.57	89.51	122	0.33	0.025059	0.289956	0.441268
29	female	68	3	11.99	71.24	62.9	19.97	0.269695	2.37563	3.02098
30	Male	83	3	11.53	93.4	171	1.55	0.11508	0.833032	1.47189
31	Male	45	2	7.07	71.44	28.8	0.31	0.024479	0.263493	0.26966
